# Supplementary material for: In vitro and in silico hybrid approach to unveil triterpenoids from Helicteres hirsuta leaves as potential compounds for inhibiting Nrf2
Source: Royal Society of Chemistry journal article supplement (doi:10.1039/d4ra07646j), 2025-01-01
Supplement: d4ra07646j1.pdf [file d4ra07646j1.pdf]

## Supplementary

Accepted 00th January 20xx

DOI: 10.1039/x0xx00000x

Received 00th January 20xx,

### ***In vitro* and *in silico* hybrid approach to unveil triterpenoids from *Helicteres hirsuta* leaves as the potential compounds for inhibiting Nrf2**

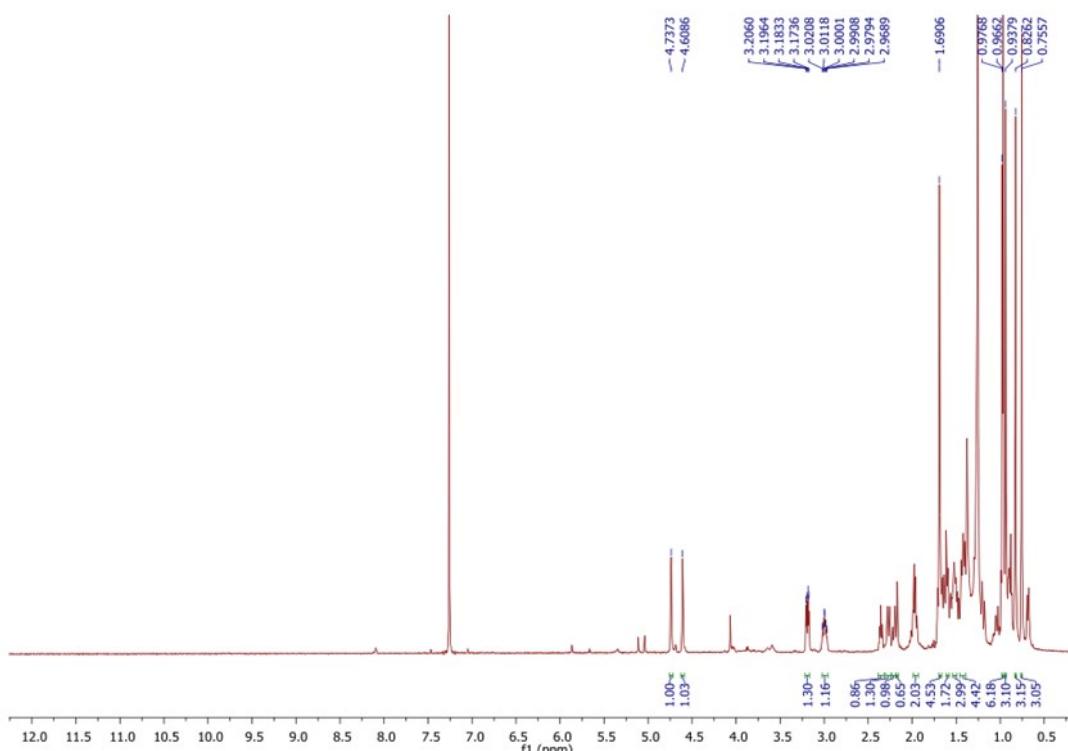

Figure S1.  $^1\text{H-NMR}$  spectrum of compound 1 (500 MHz,  $\text{CDCl}_3$ )

<sup>a</sup> University of Health Sciences, Vietnam National University Ho Chi Minh City, YA1 Administrative Building, Hai Thuong Lan Ong Street, Dong Hoa Ward, Di An City, Binh Duong Province 75308, Vietnam.

<sup>b</sup> Vietnam National University Ho Chi Minh City, Quarter 6, Linh Trung Ward, Thu Duc District, Ho Chi Minh City 70000, Vietnam.

<sup>c</sup> The University of Danang - VN-UK Institute for Research and Executive Education, 41 Le Duan Street, Hai Chau 1 ward, Hai Chau District, Danang city 50000, Vietnam.

<sup>d</sup> Faculty of Chemistry, University of Science, Ho Chi Minh City, Vietnam.

<sup>e</sup> Research lab for Drug Discovery and Development, University of Science, Ho Chi Minh City, Vietnam

<sup>f</sup> Division of Aquacultural Biotechnology, Biotechnology Centre of Ho Chi Minh City, 2374, Highway 1, Quarter 2, Trung My Tay Ward, District 12, Ho Chi Minh City 70000, Vietnam.

<sup>g</sup> Graduate Institute of Natural Products, College of Pharmacy, Kaohsiung Medical University, No.100, Shih-Chuan 1st Road, Sanmin District, Kaohsiung City 80708, Taiwan.

<sup>h</sup> National Natural Product Libraries and High-Throughput Screening Core Facility, Kaohsiung Medical University, No.100, Shih-Chuan 1st Road, Sanmin District, Kaohsiung City 80708, Taiwan.

\* Corresponding author: nmhien@medvnu.edu.vn; (+84) 373 696 894; Vietnam, 70000.

Supplementary Information available: [details of any supplementary information available should be included here]. See DOI: 10.1039/x0xx00000x

Minh Hien Nguyen<sup>a,b</sup>, Bui Quoc Huy Nguyen<sup>c</sup>, Mai Thanh Thi Nguyen<sup>b,d,e</sup>, Truong Nhat Van Do<sup>b,d,e</sup>, Tho Huu Le<sup>b,d,e</sup>, Vu Thien Han Nguyen Le<sup>a,b</sup>, Thanh Nguyen<sup>f</sup>, Chia-Hung Yen<sup>g,h</sup>

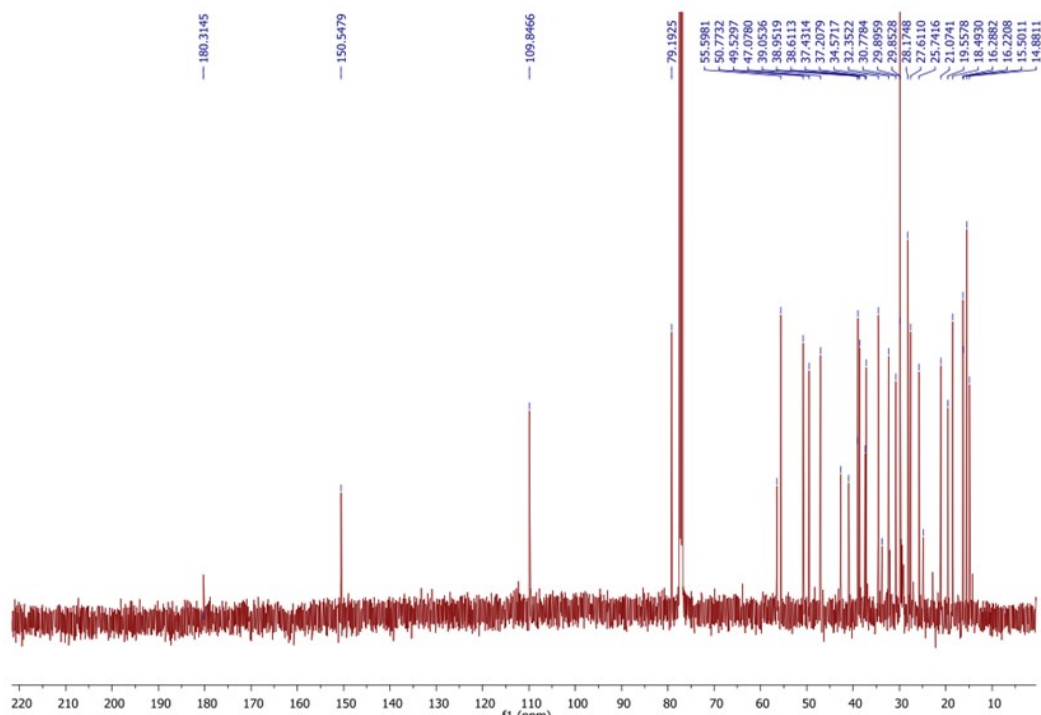

Figure S3. <sup>13</sup>C-NMR spectrum of compound 1 (125 MHz, CDCl<sub>3</sub>)

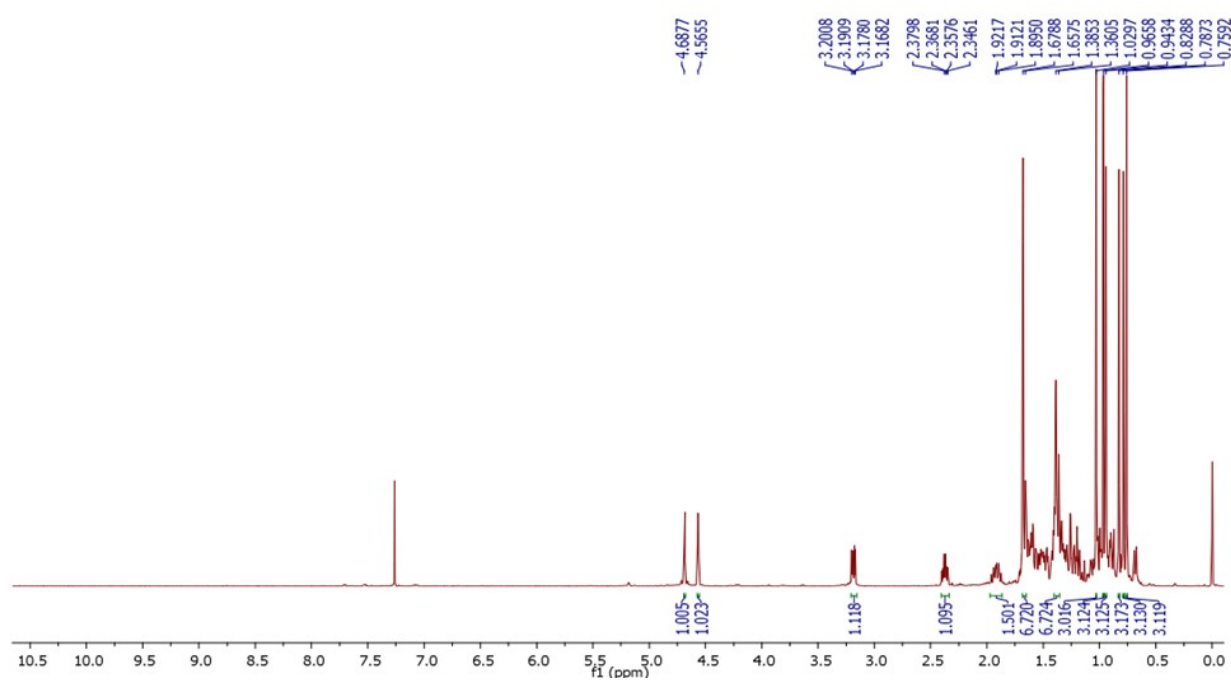

Figure S2. <sup>1</sup>H-NMR spectrum of compound 2 (500 MHz, CDCl<sub>3</sub>)

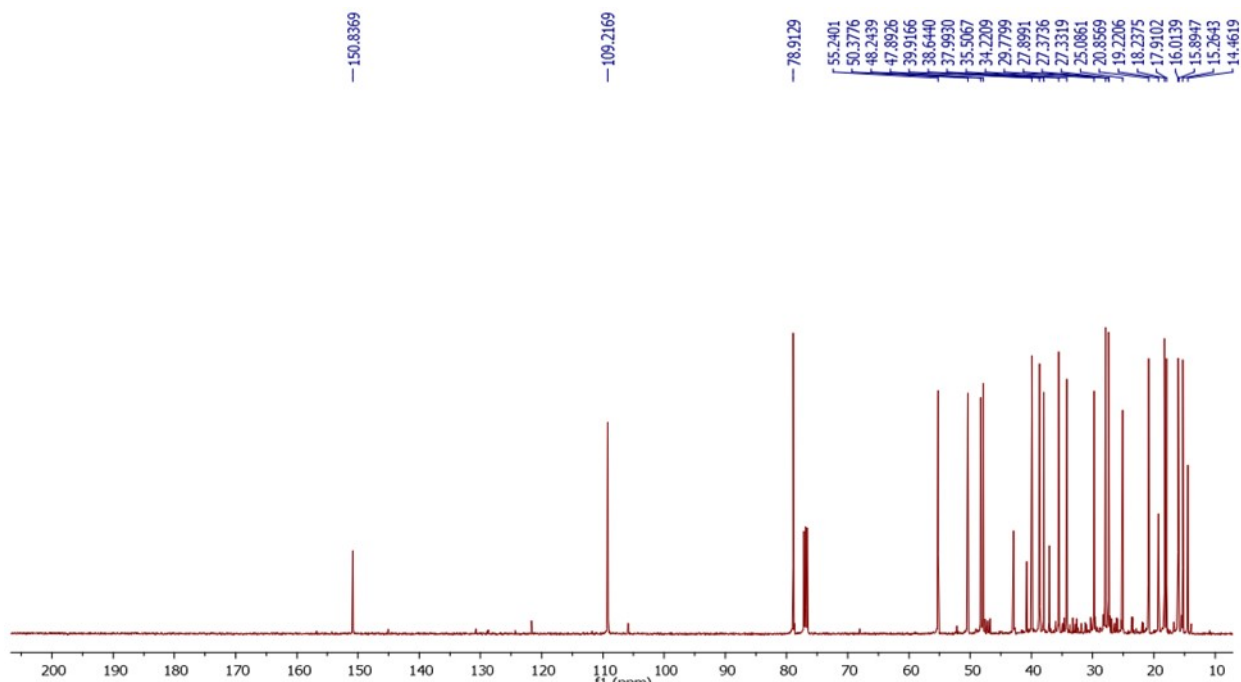Figure S4.  $^{13}\text{C}$ -NMR spectrum of compound 2 (125 MHz,  $\text{CDCl}_3$ )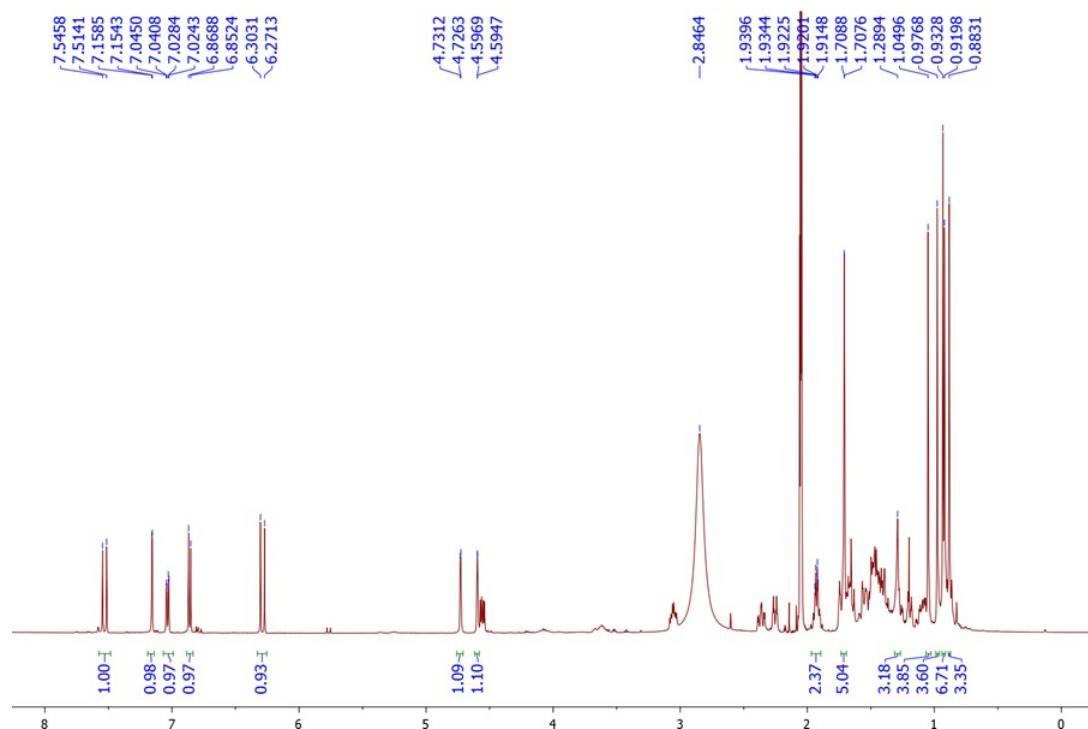Figure S5.  $^1\text{H}$ -NMR spectrum of compound 3 (500 MHz,  $\text{CD}_3\text{COCD}_3$ )

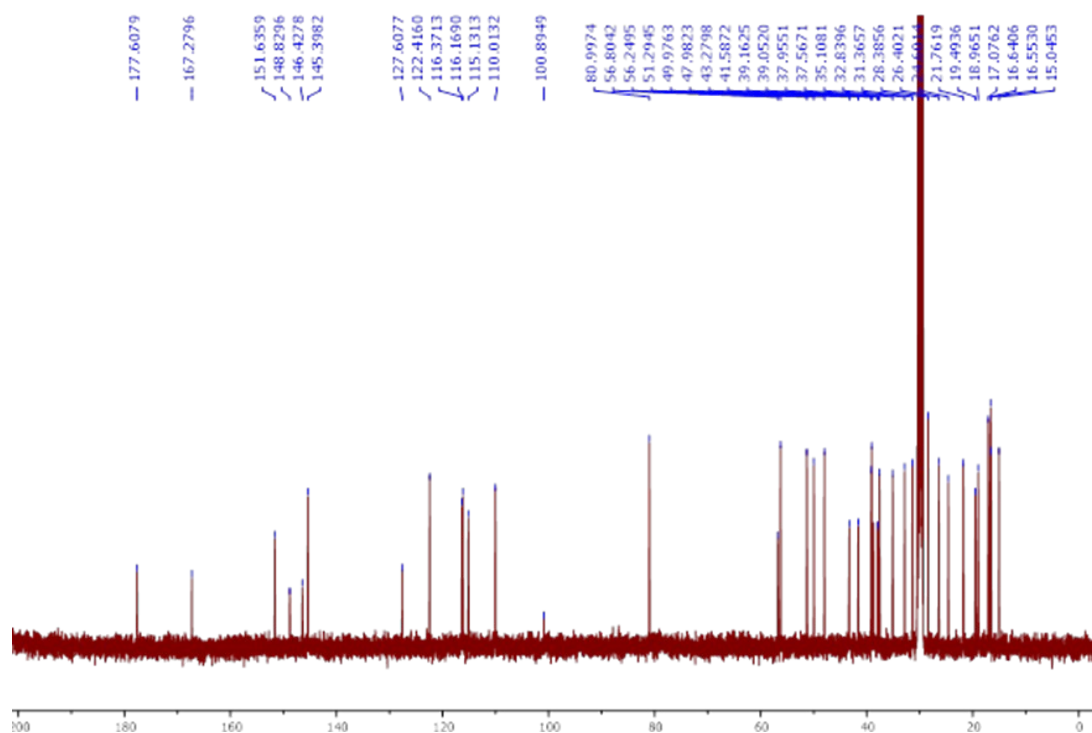Figure S7.  $^{13}\text{C}$ -NMR spectrum of compound 3 (125 MHz,  $\text{CD}_3\text{COCD}_3$ )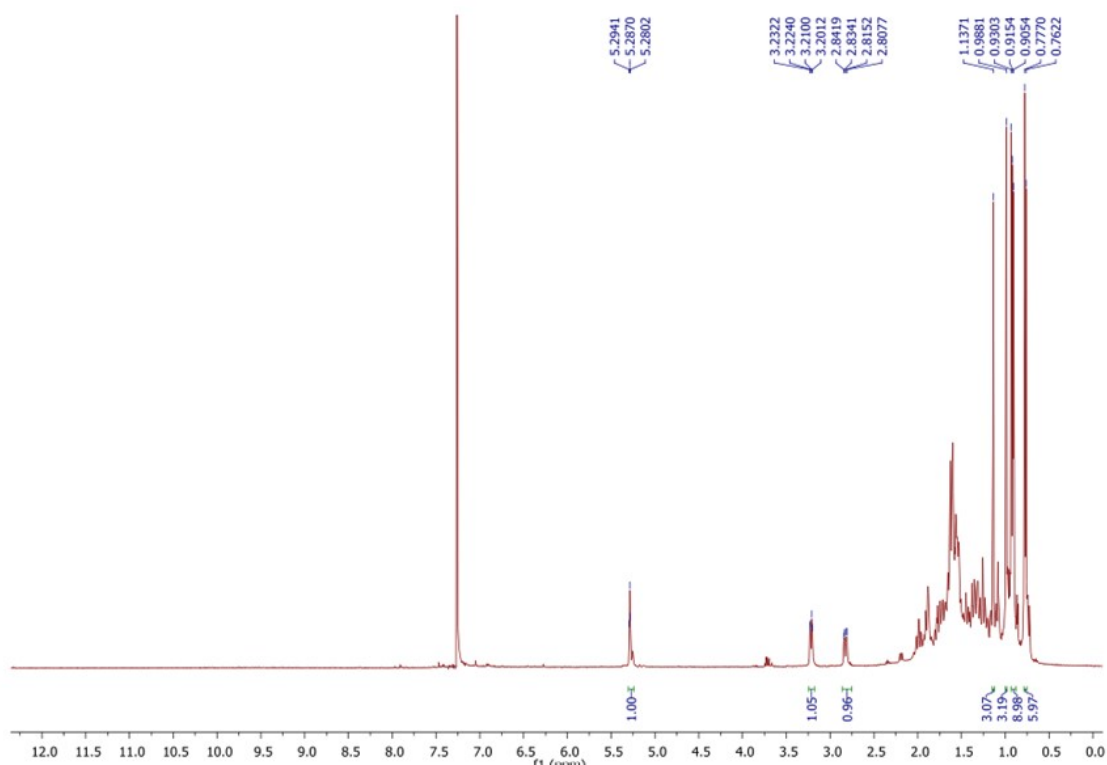Figure S6.  $^1\text{H}$ -NMR spectrum of compound 4 (500 MHz,  $\text{CDCl}_3$ )

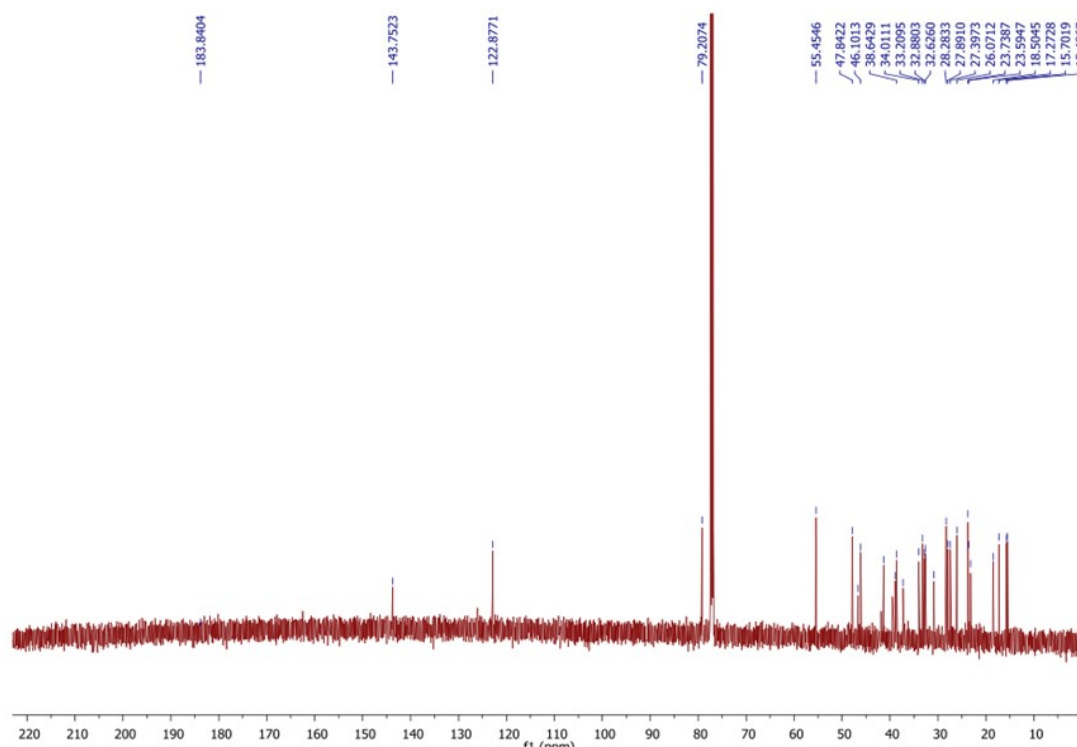Figure S9.  $^{13}\text{C}$ -NMR spectrum of compound 4 (125 MHz,  $\text{CDCl}_3$ )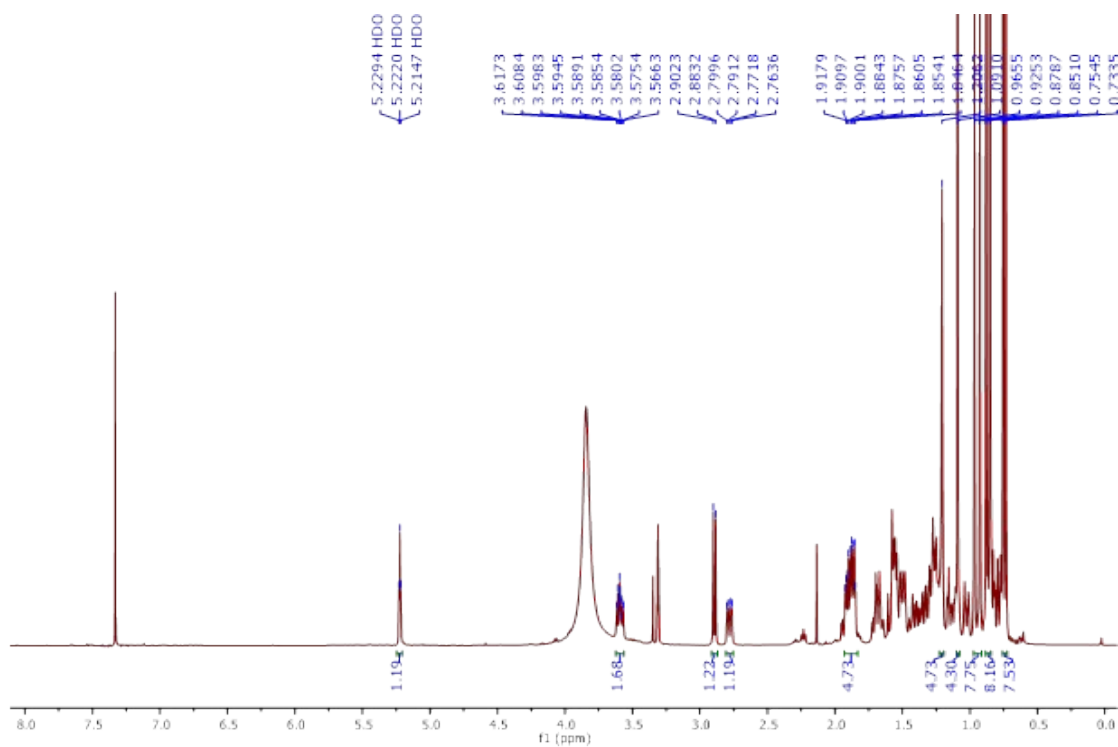Figure S8.  $^1\text{H}$ -NMR spectrum of compound 5 (500 MHz,  $\text{CDCl}_3 + \text{CD}_3\text{OD}$ )

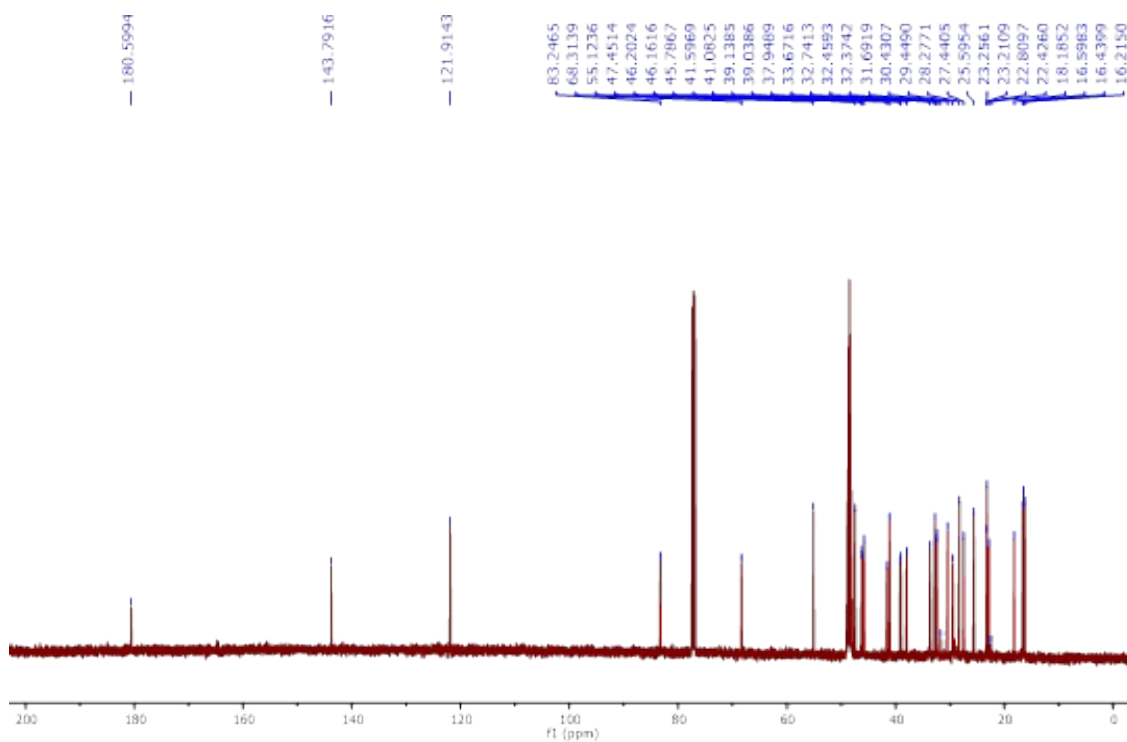Figure S10.  $^{13}\text{C}$ -NMR spectrum of compound 5 (125 MHz,  $\text{CDCl}_3 + \text{CD}_3\text{OD}$ )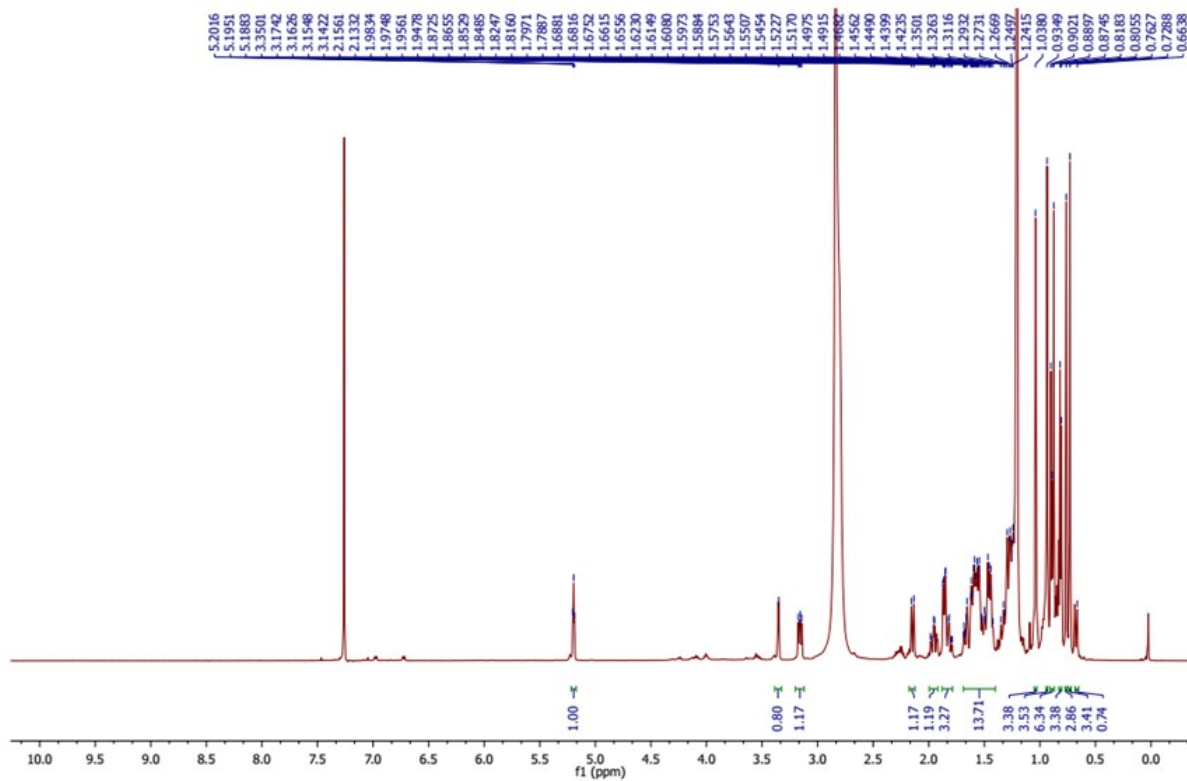Figure S11.  $^1\text{H}$ -NMR spectrum of compound 6 (500 MHz,  $\text{CDCl}_3$ )

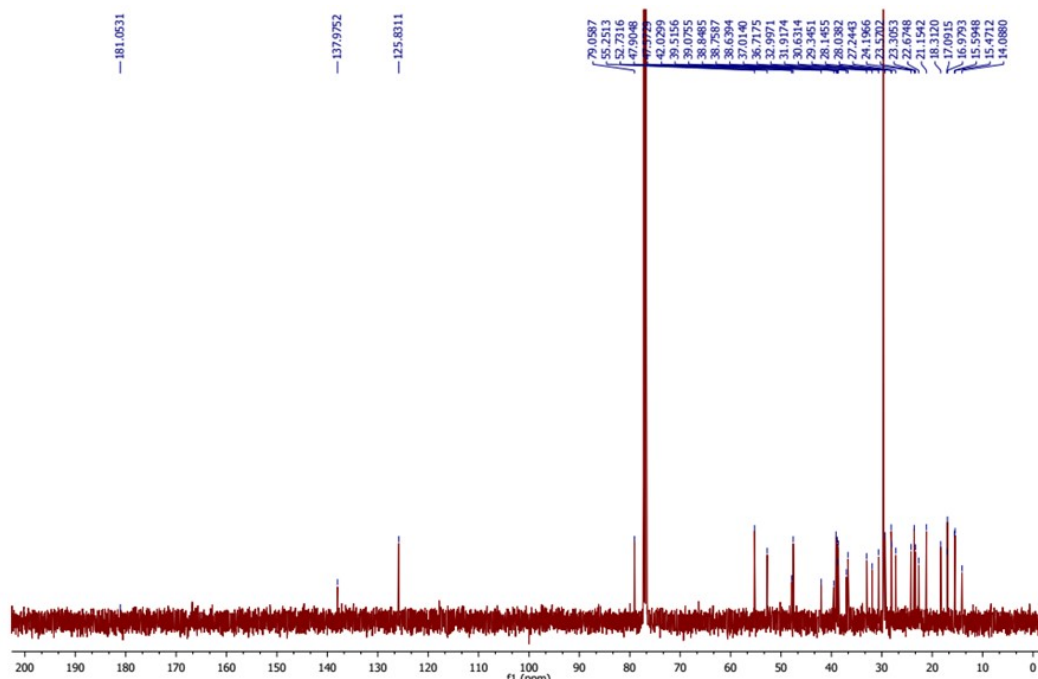Figure S12.  $^{13}\text{C}$ -NMR spectrum of compound 6 (125 MHz,  $\text{CDCl}_3$ )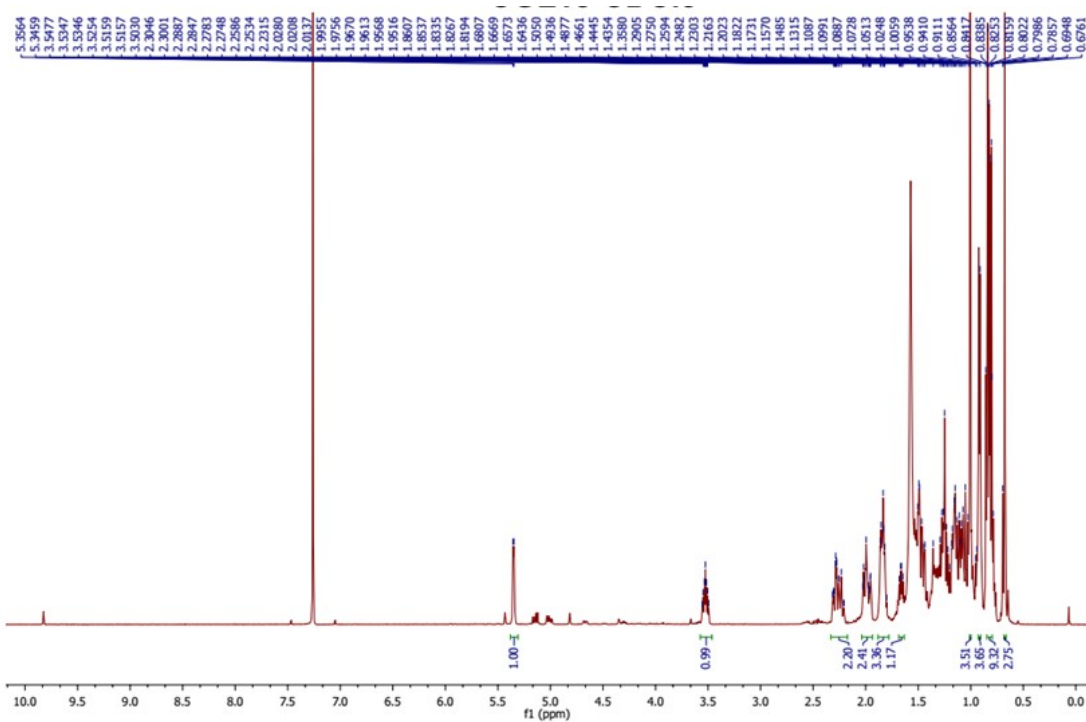Figure S13.  $^1\text{H}$ -NMR spectrum of compound 7 (500 MHz,  $\text{CDCl}_3$ )

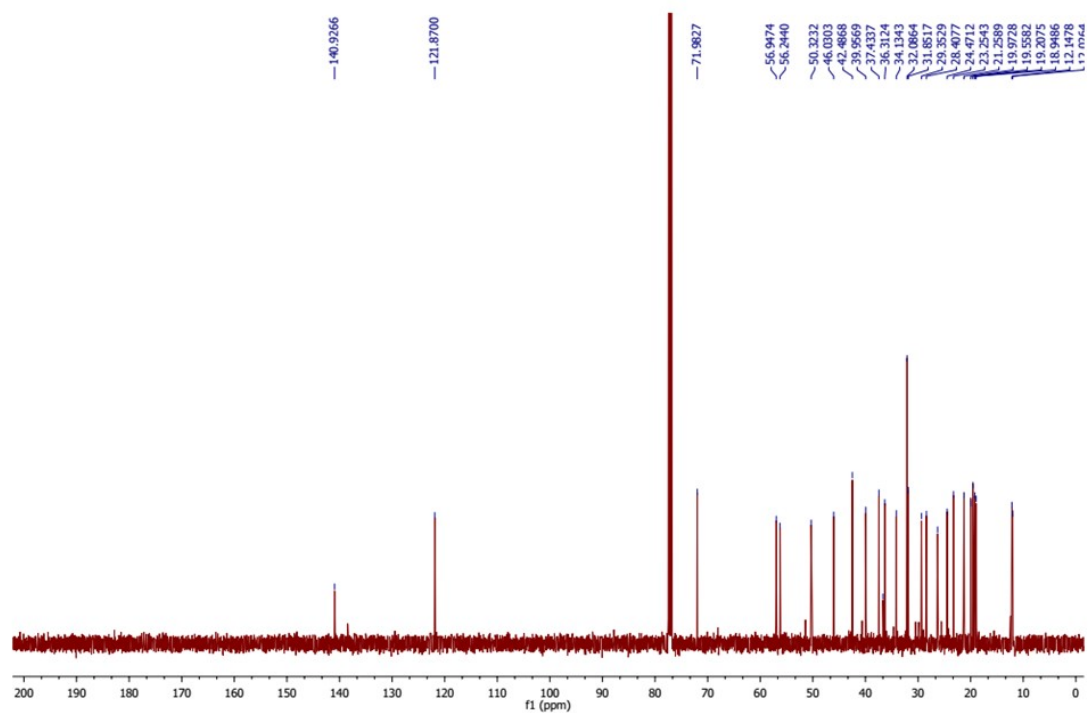

Figure S14. <sup>13</sup>C-NMR spectrum of compound 7 (125 MHz, CDCl<sub>3</sub>)
